# Supplementary material for: Esophageal regeneration following surgical implantation of a tissue engineered esophageal implant in a pediatric model
Source: PubMed Central journal article supplement (PMC8748753; doi:10.1038/s41536-021-00200-9), 2022-01-10
Supplement: 41536_2021_200_MOESM1_ESM.pdf [file 41536_2021_200_MOESM1_ESM.pdf]

## Supplementary Figures and Tables

**Supplementary Figure 1. Types and classification of Esophageal atresia**

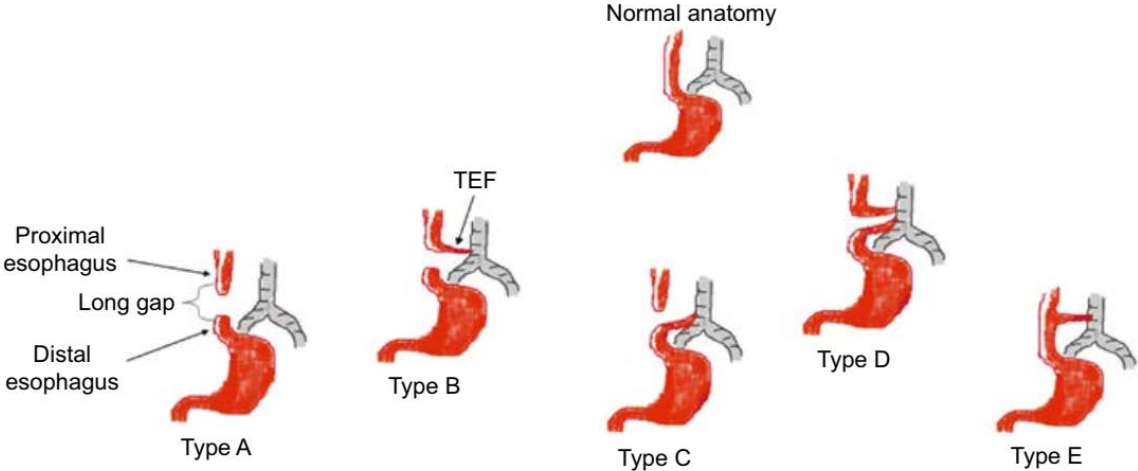

Long gap esophageal atresia presents with two blind ends of the esophagus and a missing esophageal segment (Gross type A, Vogt type II). EA Gross type B is defined as EA with a proximal fistula (Vogt type IIIA). EA with distal fistula is classified as Gross type C (Vogt IIIB) and EA with double fistulae is classified as Gross type D (Vogt IIIC) and Gross type E (H-type).

## Supplementary Figure 2. Surgical Paradigm

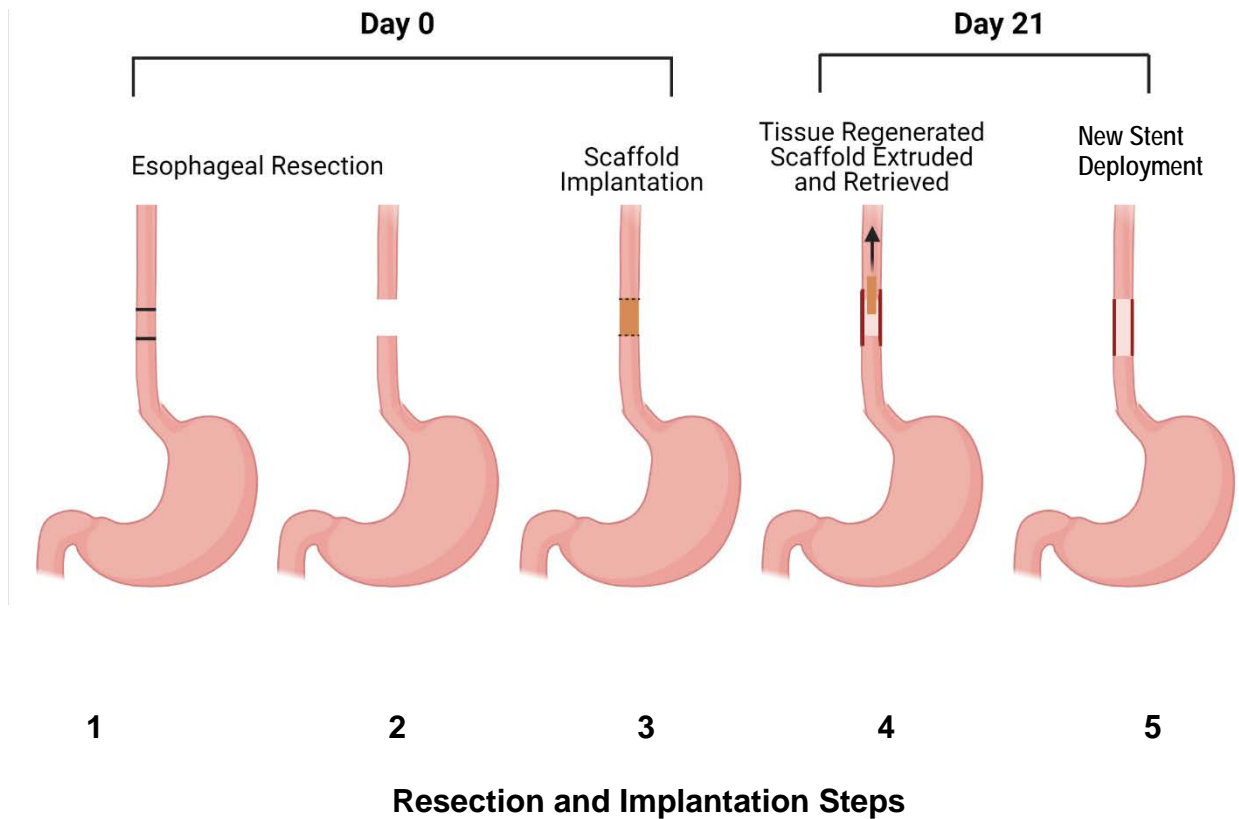

Following implantation (Steps 1-3) an initial stent is deployed to maintain luminal patency (Step 3). By day 21 post-implantation, the initial stent is removed along with the scaffold component revealing a patent fibrovascular tube of tissue (Step 4). A second stent is deployed (Step 5) and typically is retained for the following 3-6 months until further healing of the tissue permits final stent removal.

### Supplementary Figure 3. pAd-MSC Phenotypic Characterization

**a**

| Cell Line | PDT (P1-P2) | Viability |
|-----------|-------------|-----------|
| 18P0973   | 19.4 h      | 92 %      |
| 18P0974   | 20.8 h      | 94 %      |
| 19P0367   | 21.2 h      | 94 %      |
| 19P0368   | 20.9 h      | 96 %      |
| 18P0633   | 23.6 h      | 78 %      |
| 18P0634   | 24.9 h      | 98 %      |
| 18P0635   | 21.4 h      | 93 %      |
| 18P0977   | 18.5 h      | 83 %      |
| 18P0975   | 26.3 h      | 92 %      |
| 18P0459   | 21.9 h      | 85 %      |
| 18P0460   | 22.7 h      | 78 %      |
| 18P0461   | 22.2 h      | 94 %      |

**b**

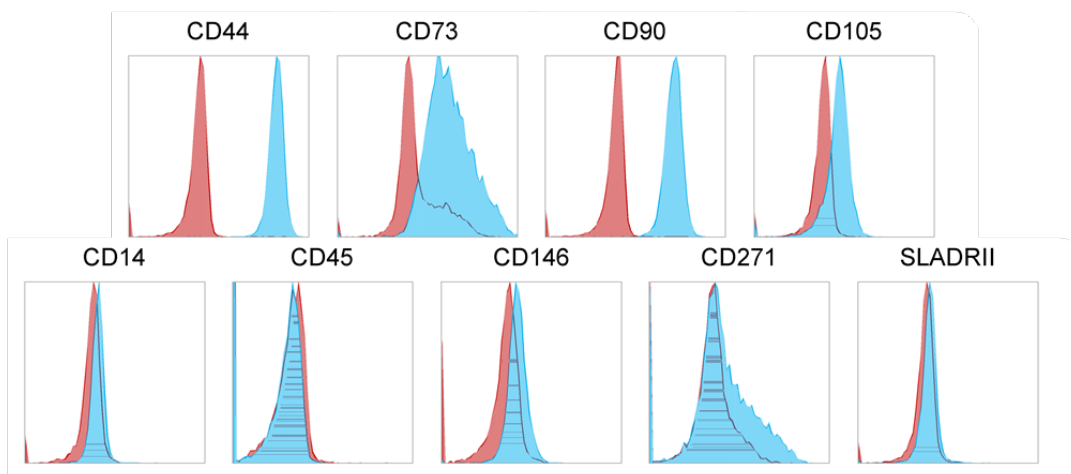

**c**

| Cell Line | CD44  | CD90  | CD105 | CD73 | CD14 | CD45 | CD146 | CD271 | SLADRII |
|-----------|-------|-------|-------|------|------|------|-------|-------|---------|
| 18P0973   | 99.9  | 99.9  | 91.4  | 83.0 | 0.9  | 0.5  | 2.8   | 3.6   | 4.3     |
| 18P0974   | 99.8  | 100.0 | 90.1  | 55.8 | 3.9  | 0.8  | 6.4   | 4.3   | 3.9     |
| 19P0367   | 100.0 | 99.9  | 60.4  | 47.0 | 0.2  | 1.1  | 0.5   | 1.6   | 0.2     |
| 19P0368   | 100.0 | 99.8  | 88.6  | 79.6 | 0.2  | 1.1  | 5.0   | 2.9   | 1.7     |
| 18P0633   | 98.5  | 76.2  | 91.4  | 90.2 | NA   | 1.2  | 14.7  | 5.1   | 1.8     |
| 18P0634   | 99.6  | 68.3  | 89.8  | 93.9 | NA   | 1.1  | 27.0  | 5.2   | 3.7     |
| 18P0635   | 98.5  | 82.9  | 93.8  | 94.0 | NA   | 2.8  | 23.7  | 11.5  | 5.7     |
| 18P0977   | 99.9  | 98.7  | NA    | 99.4 | 87.5 | 2.7  | 20.4  | 1.1   | 0.2     |
| 18P0975   | 99.9  | 73.1  | 82.5  | 99.9 | 4.8  | 0.5  | 26.4  | 12.1  | 2.3     |
| 18P0459   | 99.9  | 95.2  | 56.1  | NA   | 3.3  | 0.2  | 11.8  | 0.8   | 0.7     |
| 18P0460   | 99.7  | 79.6  | 35.2  | NA   | 3.0  | 0.1  | 8.0   | 0.3   | 0.8     |
| 18P0461   | 99.9  | 84.5  | 89.2  | NA   | 7.9  | 0.1  | 61.2  | 0.6   | 0.5     |

**(a)** Table of population doubling time calculated for pAd-MSCs between passage 1 and passage 2 and viability at P2, determined via cell count using trypan blue. Calculations based upon live cells only. **(b)** Representative flow cytometry peaks of pAd-MSCs (18P0975, Passage 2). **(c)** Percent positive cells of each indicated cell surface marker as determined by flow cytometry.

## Supplementary Figure 4. Scaffold Design and CEI Final Product

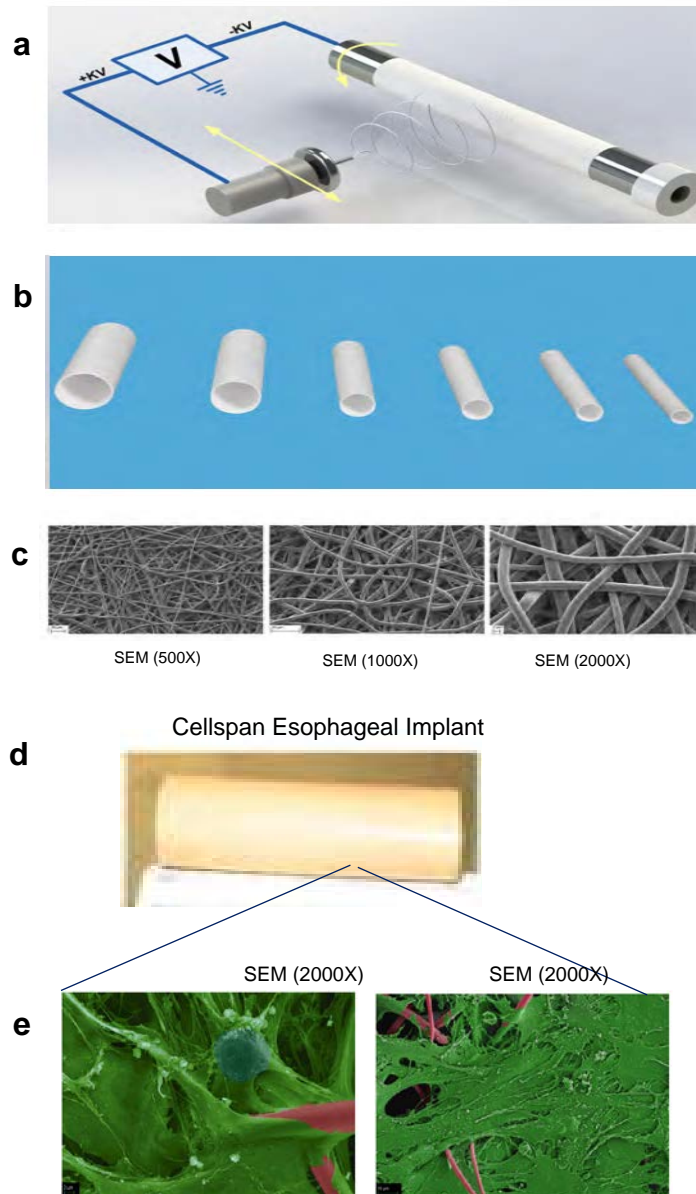

Electrospinning apparatus and scaffold mandril (**a**). Various sized tubular scaffolds (**b**). Scanning electron micrographs of the scaffold overlapping fibers (500x, 1000x and 2000x magnifications, left to right panels, respectively (**c**)). CEI final cell seeded product-post bioreactor incubation (**d**). Colorized SEM micrographs of cells (green) attached to scaffold fibers (red, **e**).

## Supplementary Figure 5. CEI Characterization

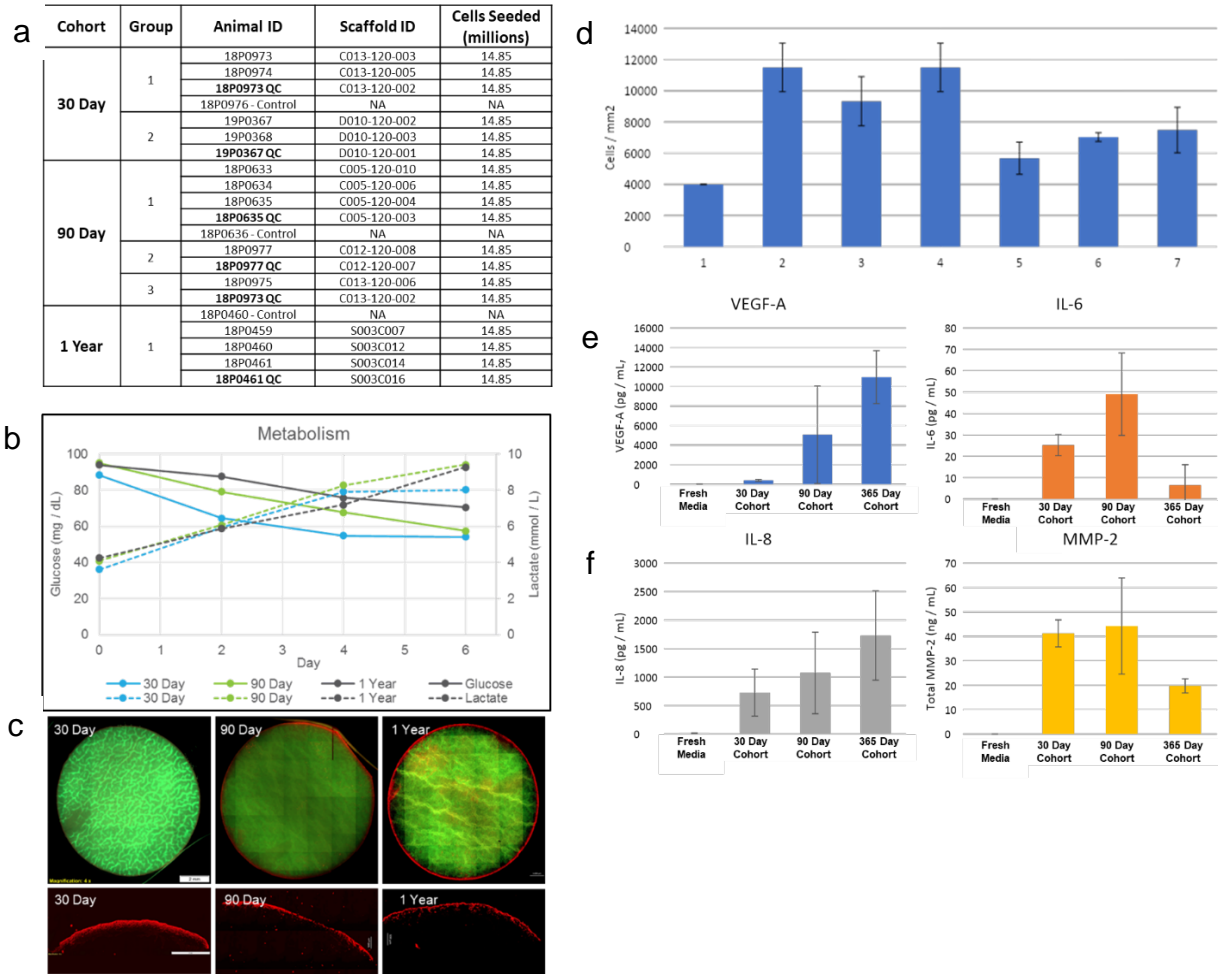

Metabolic and viability. (A) Table of CEI production and cell seeding number information. (B). Average metabolic readings for each cohort of CEIs. Glucose values are represented by solid lines, while lactate values, plotted on the secondary axis, are represented by dashed lines. (C). Representative images of cell viability on quality control CEIs (30 day QC, 90 Day QC, 1 year QC). QC CEIs were analyzed using a LIVE/DEAD assay where CEI punches were stained with calcein AM (green; live cells) and ethidium bromide (red; dead cells). (D) Representative images of translocation of cells throughout quality control CEIs (30 day QC, 90 Day QC, 1 year QC). Fixed CEIs were cryosectioned and stained with ethidium bromide (red; fixed cells) to visualize the depth of cellular penetration. (E) Cell quantification of QC CEIs. Punches from each QC CEI were frozen for >24 hours, then DNA was extracted and quantified. Cell number per QC punch was extrapolated from DNA quantity. (F) Cytokine expression of CEIs in each cohort. Conditioned media was tested for the indicated cytokines via ELISA. Averages from 5 punch samples are displayed for each cohort. Error bars represent the SEM from the 5 samples.

Supplementary Figure 6. Growth Chart for 365-day animals

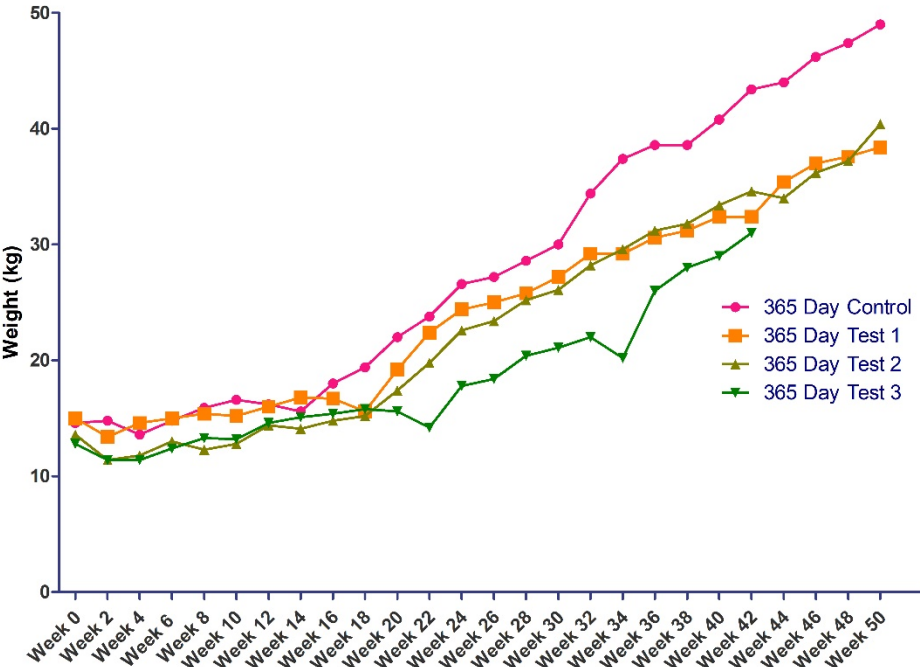

**Supplementary Figure 7. Diagram of the various tissue zones in both treated and control animals.**

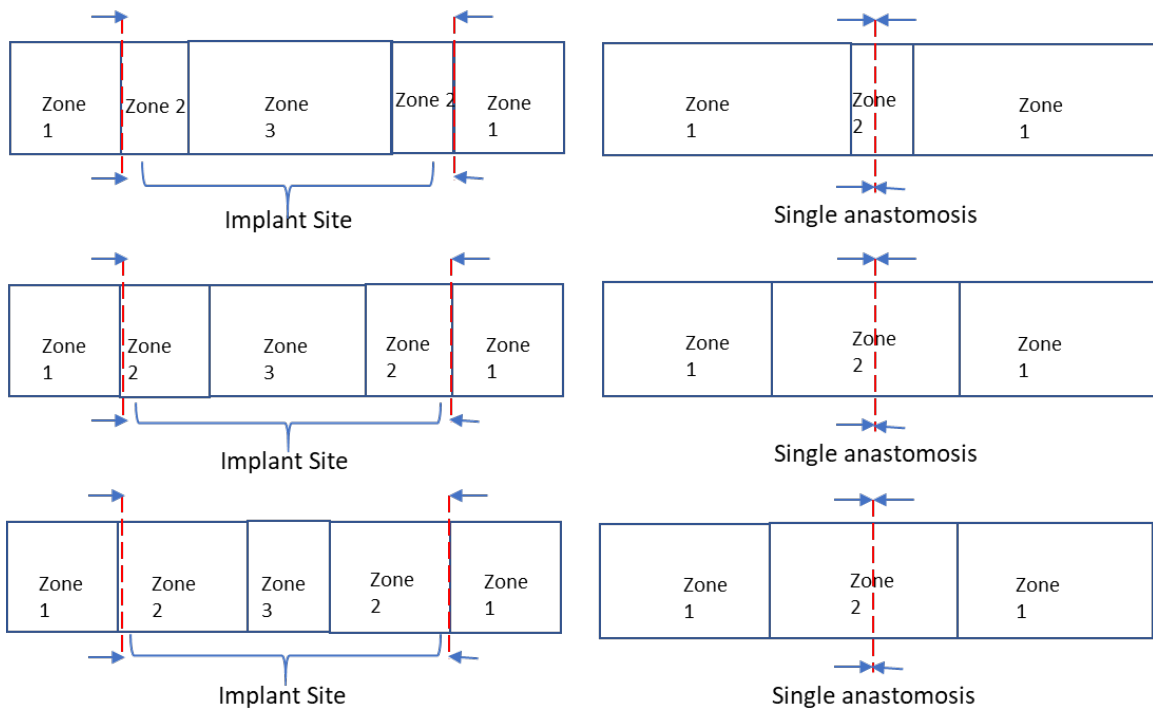



**Supplementary Table 1. Flow Cytometry & Primary Antibodies**

| <b>Antibody</b>           | <b>Color</b> | <b>Company</b>  | <b>Catalog #</b> |
|---------------------------|--------------|-----------------|------------------|
| CD105                     | PerCP        | Novus           | NB110-58718PCP   |
| CD14                      | AF488        | Novus           | FAB4597G         |
| CD146                     | FITC         | BioRad          | MCA2141F         |
| CD271                     | Unconjugated | Thermo Fisher   | 12-9400-82       |
| CD44                      | PECy7        | Thermo Fisher   | 25-0441-82       |
| CD45                      | PECy7        | Thermo Fisher   | 25-0459-42       |
| CD73                      | Unconjugated | RD Systems      | AF4488           |
| CD90                      | PECy7        | Thermo Fisher   | 25-909-42        |
| CK13                      | Unconjugated | Invitrogen      | MA1-90939        |
| GAP43                     | Unconjugated | Novus Biologics | NB300-143SS      |
| Isotype Control           | FITC         | Thermo Fisher   | 11-4732-42       |
| Isotype Control           | FITC         | Thermo Fisher   | 11-4714-82       |
| Isotype Control           | PECy7        | Thermo Fisher   | 25-4714-42       |
| Isotype Control           | PECy7        | Thermo Fisher   | 25-4732-81       |
| Isotype Control           | PerCP        | Biolegend       | 400250           |
| Isotype Control           | Unconjugated | Thermo Fisher   | 31243            |
| Isotype Control           | Unconjugated | Thermo Fisher   | 14-4714-82       |
| Secondary Antibody        | FITC         | Thermo Fisher   | 31627            |
| Secondary Antibody        | PECy7        | Biolegend       | 406614           |
| Secondary Antibody-Mouse  | HRP          | Biocare         | BRR4002          |
| Secondary Antibody-Rabbit | HRP          | Biocare         | BRR4009          |
| SLADR11                   | FITC         | BioRad          | MCA2314F         |
| SM22                      | Unconjugated | Abcam           | Ab14106          |

**Supplementary Table 2. CT Imaging Timepoints**

| <b>Animal ID</b> | <b>Cohort</b> | <b>Device Group</b> | <b>Timepoint</b> |
|------------------|---------------|---------------------|------------------|
| 18P0458          | 1-365 Day     | Control             | Day 350          |
| 18P0459          | 1-365 Day     | Test                | Day 118          |
| 18P0459          | 1-365 Day     | Test                | Day 297          |
| 18P0460          | 1-365 Day     | Test                | Day 349          |
| 18P0461          | 1-365 Day     | Test                | Day 350          |
| 18P0975          | 2- 90 Day     | Test                | Day 0            |
| 18P0975          | 2- 90 Day     | Test                | Day 7            |
| 18P0975          | 2- 90 Day     | Test                | Day 20           |
| 18P0975          | 2- 90 Day     | Test                | Day 90           |
| 18P0976          | 3- 30 Day     | Control             | Day 7            |
| 18P0976          | 3- 30 Day     | Control             | Day 20           |
| 18P0973          | 3- 30 Day     | Test                | Day 7            |
| 18P0973          | 3- 30 Day     | Test                | Day 21           |
| 18P0974          | 3- 30 Day     | Test                | Day 20           |

**Supplementary Table 3. General Histopathologic Changes at Day 30 post implantation**

| ANATOMIC REGION                                            | Day 30 Test<br><i>Animal 18P0973 (slides 2,3,6,7); Animal 19P0368 (slides 2,5); Animal 18P0974 (slides 2,5); Animal 19P0367 (slides 2,5)</i> |                                                                                                                                                                                                                                                                                  |                                                                                                                                                                                                                                                                | Day 30 Control<br>(Zone 2 only)<br><i>Animal 19P0976 (slides 2,5)</i>                                                                                |
|------------------------------------------------------------|----------------------------------------------------------------------------------------------------------------------------------------------|----------------------------------------------------------------------------------------------------------------------------------------------------------------------------------------------------------------------------------------------------------------------------------|----------------------------------------------------------------------------------------------------------------------------------------------------------------------------------------------------------------------------------------------------------------|------------------------------------------------------------------------------------------------------------------------------------------------------|
|                                                            | ZONE 1                                                                                                                                       | ZONE 2                                                                                                                                                                                                                                                                           | ZONE 3                                                                                                                                                                                                                                                         | ZONE 2                                                                                                                                               |
| Mucosa<br>(Epithelium, Lamina Propria, Muscularis Mucosae) | <i>Ulceration in 1/4 animals. Epithelial hyperplasia in 4/4 animals.</i>                                                                     | <i>Epithelialization complete with epithelial hyperplasia in 4/4 animals. Lamina propria: minimal to moderate fibrovascular tissue and minimal to moderate inflammation. Muscularis mucosae: Mixed areas of muscular and fibrovascular tissue. Minimal to mild inflammation.</i> | <i>Minimal epithelialization with epithelial hyperplasia in 3/4 animals. Remaining surface is not epithelialized. Fragments of scaffold-like material present on the mucosal surface of 1/4 animals (Animal 19P0368). No evidence of smooth muscle fibers.</i> | <i>Minimal epithelialization with epithelial hyperplasia. Remaining surface is markedly unepithelialized.</i>                                        |
| Submucosa                                                  | <i>Mostly normal.</i>                                                                                                                        | <i>Minimal to moderate fibrovascular tissue and inflammation.</i>                                                                                                                                                                                                                | <i>Moderate to marked fibrovascular tissue replaces submucosa in 4/4 animals. Normal submucosa is not present.</i>                                                                                                                                             | <i>Marked fibrovascular tissue replaces submucosa. Normal submucosa is not present.</i>                                                              |
| Tunica Muscularis Propria                                  | <i>Normal</i>                                                                                                                                | <i>Minimal, mild or moderate amounts of muscle in 4/4 animals. Minimal to moderate fibrovascular tissue and inflammation. Neovascularization not detected.</i>                                                                                                                   | <i>Moderate to marked fibrovascular tissue replaces tunica muscularis in 4/4 animals. Normal tunica muscularis is not present. Neovascularization not detected.</i>                                                                                            | <i>Moderate to marked fibrovascular tissue replaces tunica muscularis. Normal tunica muscularis is not present. Neovascularization not detected.</i> |
| Adventitia                                                 | <i>Minimal to marked fibrovascular tissue in 4/4 animals. Lung adhesions in 1/4 animals.</i>                                                 | <i>Mild to marked fibrovascular tissue in 4/4 animals. Lung adhesions in 1/4 animals.</i>                                                                                                                                                                                        | <i>Mild to marked fibrovascular tissue in 4/4 animals. Lung adhesions in 2/4 animals.</i>                                                                                                                                                                      | <i>Moderate to marked fibrovascular tissue. Lung adhesions present.</i>                                                                              |

Changes may vary between sections and animals. In Zone 3 (Test) and Zone 2 (Control), a comment on neovascularization was added to the Tunica Muscularis Propria line for organization purposes but there was no differentiation between normal esophageal layers in these areas.

**Supplementary Table 4. General Histopathologic Changes at Day 90 post implantation**

| <i>General Histopathologic Changes Typical of Each Zone in Esophageal Tissue Sections at Day 90</i> |                                                                                                                          |                                                                                                                                                                                                                                                                           |                                                                                                                                                                                                                                                                                                                                                       |                                                                                                                                                         |
|-----------------------------------------------------------------------------------------------------|--------------------------------------------------------------------------------------------------------------------------|---------------------------------------------------------------------------------------------------------------------------------------------------------------------------------------------------------------------------------------------------------------------------|-------------------------------------------------------------------------------------------------------------------------------------------------------------------------------------------------------------------------------------------------------------------------------------------------------------------------------------------------------|---------------------------------------------------------------------------------------------------------------------------------------------------------|
| <b>ANATOMIC REGION</b>                                                                              | <b>Day 90 Test</b><br><i>Animal 18P0633 (slides 2,5); Animal 18P0634 (slides 2,5);<br/>Animal 18P0975 (slides 17,20)</i> |                                                                                                                                                                                                                                                                           |                                                                                                                                                                                                                                                                                                                                                       | <b>Day 90 Control (Zone 2 only)</b><br><i>Animal 18P0636 (slides 2,5)</i>                                                                               |
|                                                                                                     | <b>ZONE 1</b>                                                                                                            | <b>ZONE 2</b>                                                                                                                                                                                                                                                             | <b>ZONE 3</b>                                                                                                                                                                                                                                                                                                                                         | <b>ZONE 2</b>                                                                                                                                           |
| <b>Mucosa</b><br>(Epithelium, Lamina Propria, Muscularis Mucosae)                                   | <i>Epithelial hyperplasia in 3/3 animals.</i>                                                                            | <i>Epithelialization complete with epithelial hyperplasia in 3/3 animals. Lamina propria: mild to moderate fibrovascular tissue and minimal to mild inflammation. Muscularis mucosae: Mixed areas of muscular and fibrovascular tissue. Minimal to mild inflammation.</i> | <i>Epithelialization complete or nearly complete with epithelial hyperplasia in 2/2 animals assessed. Epithelialization not assessed in 1/3 animals. Mild absence of epithelialization in 1/3 animals. Fibrovascular tissue replaces lamina propria and muscularis mucosae, which are not present. Scattered smooth muscle fibers in 3/3 animals.</i> | <i>Epithelialization complete with epithelial hyperplasia. Scattered smooth muscle fibers.</i>                                                          |
| <b>Submucosa</b>                                                                                    | <i>Normal</i>                                                                                                            | <i>Mild to moderate fibrovascular tissue and minimal to mild inflammation.</i>                                                                                                                                                                                            | <i>Marked fibrovascular tissue replaces submucosa. Normal submucosa is not present.</i>                                                                                                                                                                                                                                                               | <i>Marked fibrovascular tissue replaces submucosa. Normal submucosa is not present.</i>                                                                 |
| <b>Tunica Muscularis Propria</b>                                                                    | <i>Normal</i>                                                                                                            | <i>Minimal amounts of muscle in 1/3 animals. Mild to moderate fibrovascular tissue and minimal to mild inflammation. Minimal neovascularization present in 3/3 animals.</i>                                                                                               | <i>Moderate fibrovascular tissue replaces tunica muscularis. Normal tunica muscularis is not present. Minimal neovascularization present in 3/3 animals.</i>                                                                                                                                                                                          | <i>Moderate to marked fibrovascular tissue replaces tunica muscularis. Normal tunica muscularis is not present. Minimal neovascularization present.</i> |
| <b>Adventitia</b>                                                                                   | <i>Minimal to moderate fibrovascular tissue in 2/3 animals. Lung adhesions in 1/3 animals.</i>                           | <i>Minimal to moderate fibrovascular tissue in 3/3 animals. Lung adhesions in 1/3 animals.</i>                                                                                                                                                                            | <i>Minimal to moderate fibrovascular tissue in 3/3 animals. Lung adhesions in 2/3 animals.</i>                                                                                                                                                                                                                                                        | <i>Moderate fibrovascular tissue.</i>                                                                                                                   |

Changes may vary between sections and animals. In Zone 3 (Test) and Zone 2 (Control), a comment on neovascularization was added to the Tunica Muscularis Propria line for organization purposes but there was no differentiation between normal esophageal layers in these areas.

**Supplementary Table 5. General Histopathologic Changes at Day 365 post implantation**

| <i>General Histopathologic Changes Typical of Each Zone in Esophageal Tissue Sections at Day 365</i> |                                                                                        |                                                                                                                                                                                                                                                                           |                                                                                                                                                                                                                |                                                                                                                                      |
|------------------------------------------------------------------------------------------------------|----------------------------------------------------------------------------------------|---------------------------------------------------------------------------------------------------------------------------------------------------------------------------------------------------------------------------------------------------------------------------|----------------------------------------------------------------------------------------------------------------------------------------------------------------------------------------------------------------|--------------------------------------------------------------------------------------------------------------------------------------|
| <b>ANATOMIC REGION</b>                                                                               | <b>Day 365 Test</b><br><i>Animal 18P0460 (slides 2,5); Animal 18P0461 (slides 2,5)</i> |                                                                                                                                                                                                                                                                           |                                                                                                                                                                                                                | <b>Day 365 Control (Zone 2 only)</b><br><i>Animal 18P0458 (slides 2,5)</i>                                                           |
|                                                                                                      | <b>ZONE 1</b>                                                                          | <b>ZONE 2</b>                                                                                                                                                                                                                                                             | <b>ZONE 3</b>                                                                                                                                                                                                  | <b>ZONE 2</b>                                                                                                                        |
| <b>Mucosa</b><br>(Epithelium, Lamina Propria, Muscularis Mucosae)                                    | <i>Epithelial hyperplasia in 2/2 animals.</i>                                          | <i>Epithelialization complete with epithelial hyperplasia in 2/2 animals. Lamina propria: mild to moderate fibrovascular tissue and minimal to mild inflammation. Muscularis mucosae: Mixed areas of muscular and fibrovascular tissue. Minimal to mild inflammation.</i> | <i>Epithelialization complete with epithelial hyperplasia in 2/2 animals. Fibrovascular tissue replaces lamina propria and muscularis mucosae, which are not present. Smooth muscle fibers in 2/2 animals.</i> | <i>Epithelialization complete with epithelial hyperplasia. Smooth muscle fibers present.</i>                                         |
| <b>Submucosa</b>                                                                                     | <i>Normal</i>                                                                          | <i>Mild to moderate fibrovascular tissue and minimal to mild inflammation.</i>                                                                                                                                                                                            | <i>Moderate fibrovascular tissue and minimal to mild inflammation.</i>                                                                                                                                         | <i>Moderate fibrovascular tissue and minimal inflammation.</i>                                                                       |
| <b>Tunica Muscularis Propria</b>                                                                     | <i>Normal</i>                                                                          | <i>Mild to moderate fibrovascular tissue replaces tunica muscularis. Normal tunica muscularis not present. Minimal neovascularization present in ½ animals.</i>                                                                                                           | <i>Moderate fibrovascular tissue replaces tunica muscularis. Normal tunica muscularis not present. Minimal vascularization present in ½ animals and mild vascularization present in ½ animals.</i>             | <i>Moderate fibrovascular tissue replaces tunica muscularis. Normal tunica muscularis not present. Mild vascularization present.</i> |
| <b>Adventitia</b>                                                                                    | <i>Minimal to moderate fibrovascular tissue in 2/2 animals.</i>                        | <i>Minimal to moderate fibrovascular tissue in 2/2 animals.</i>                                                                                                                                                                                                           | <i>Mild to moderate fibrovascular tissue in 2/2 animals. Lung adhesions in 2/2 animals.</i>                                                                                                                    | <i>Moderate fibrovascular tissue.</i>                                                                                                |

Changes may vary between sections and animals. In Zone 3 (Test) and Zone 2 (Control), a comment on neovascularization was added to the Tunica Muscularis Propria line for organization purposes but there was no differentiation between normal esophageal layers in these zones.

**Supplementary Table 6. Immunohistochemical Findings at Day 365 post implantation**

| ANATOMIC REGION           | Day 365 Test<br><i>Animal 18P0460 (slide 2);<br/>Animal 18P0461 (slide 2)</i>                                                                                                                               |                                                                                                                                                                                                                                                                                                |                                                                                                                                                                                                                                                                                                | Day 365 Control<br><b>(Zone 2 only)</b><br><i>Animal 18P0458 (slide 2)</i>         |
|---------------------------|-------------------------------------------------------------------------------------------------------------------------------------------------------------------------------------------------------------|------------------------------------------------------------------------------------------------------------------------------------------------------------------------------------------------------------------------------------------------------------------------------------------------|------------------------------------------------------------------------------------------------------------------------------------------------------------------------------------------------------------------------------------------------------------------------------------------------|------------------------------------------------------------------------------------|
|                           | ZONE 1                                                                                                                                                                                                      | ZONE 2                                                                                                                                                                                                                                                                                         | ZONE 3                                                                                                                                                                                                                                                                                         | ZONE 2                                                                             |
| Epithelium                | <i>Suprabasal epithelium: CK13, CK14.<br/>Basal epithelium: CK14, p63, Ki67.<br/>Inflammatory cells: Ki67.</i>                                                                                              |                                                                                                                                                                                                                                                                                                |                                                                                                                                                                                                                                                                                                | <i>Suprabasal epithelium:<br/>CK13, CK14.<br/>Basal epithelium:<br/>CK14, p63.</i> |
| Lamina Propria            | <i>Blood vessels: SMA and SM22 (smooth muscle), CD31 (endothelium).<br/>Nerve fibers: GAP-43.<br/>Inflammatory cells: Ki67.</i>                                                                             |                                                                                                                                                                                                                                                                                                |                                                                                                                                                                                                                                                                                                |                                                                                    |
| Muscularis Mucosae        | <i>Smooth muscle: SMA and SM22.<br/>Blood vessels: SMA and SM22 (smooth muscle), CD31 (endothelium).<br/>Nerve fibers: GAP-43.<br/>Inflammatory cells: Ki67.</i>                                            | <i>No discernible layers. All structures present in fibrovascular tissue.<br/>Blood vessels: SMA and SM22 (smooth muscle), CD31 (endothelium).<br/>Myofibroblasts: SMA and SM22.<br/>Scattered smooth muscle fibers: SMA and SM22.<br/>Nerve fibers: GAP-43.<br/>Inflammatory cells: Ki67.</i> | <i>No discernible layers. All structures present in fibrovascular tissue.<br/>Blood vessels: SMA and SM22 (smooth muscle), CD31 (endothelium).<br/>Myofibroblasts: SMA and SM22.<br/>Scattered smooth muscle fibers: SMA and SM22.<br/>Nerve fibers: GAP-43.<br/>Inflammatory cells: Ki67.</i> |                                                                                    |
| Submucosa                 | <i>Blood vessels: SMA and SM22 (smooth muscle), CD31 (endothelium).<br/>Nerve fibers: GAP-43.<br/>Inflammatory cells: Ki67.</i>                                                                             |                                                                                                                                                                                                                                                                                                |                                                                                                                                                                                                                                                                                                |                                                                                    |
| Tunica Muscularis Propria | <i>Striated skeletal muscle: MYL1 (MY32).<br/>Smooth muscle: SMA and SM22.<br/>Blood vessels: SMA and SM22 (smooth muscle), CD31 (endothelium).<br/>Nerve fibers: GAP-43.<br/>Inflammatory cells: Ki67.</i> |                                                                                                                                                                                                                                                                                                |                                                                                                                                                                                                                                                                                                |                                                                                    |
| Adventitia                | <i>Blood vessels: SMA and SM22 (smooth muscle), CD31 (endothelium).<br/>Nerve fibers: GAP-43.<br/>Inflammatory cells: Ki67.</i>                                                                             |                                                                                                                                                                                                                                                                                                |                                                                                                                                                                                                                                                                                                |                                                                                    |
